# Supplementary material for: Influence of inflammatory conditions provided by macrophages on osteogenic ability of mesenchymal stem cells
Source: PubMed Central journal article supplement (PMC7020593; doi:10.1186/s13287-020-1578-1), 2020-02-13
Supplement: 13287_2020_1578_MOESM1_ESM.pdf [file 13287_2020_1578_MOESM1_ESM.pdf]

## Additional File 1

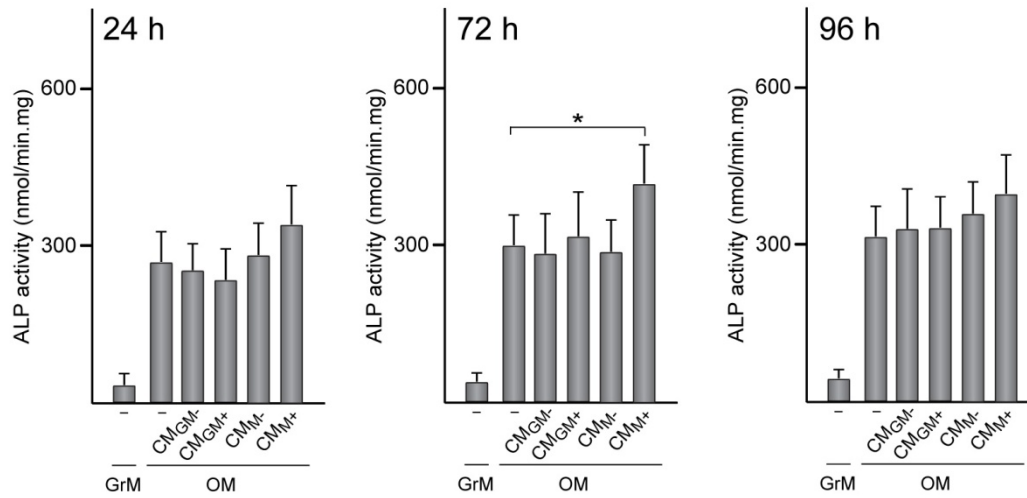

**Figure S1.** ALP activity in MSC treated for 24, 72 or 96 h with CM from  $M\Phi_{GM}$  and  $M\Phi_M$  activated ( $CM_{GM+}$  and  $CM_{M+}$ , respectively) or not ( $CM_{GM-}$  and  $CM_{M-}$ , respectively) with LPS and further incubated in osteogenic medium (OM) for 14 days. Untreated MSC (-) were incubated in growth medium (GrM) or OM for 14 days. \* $p < 0.05$  between the indicated conditions.

3 days

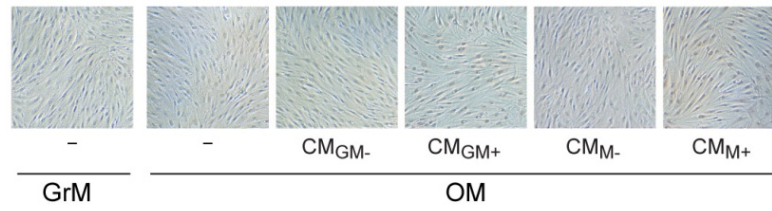

7 days

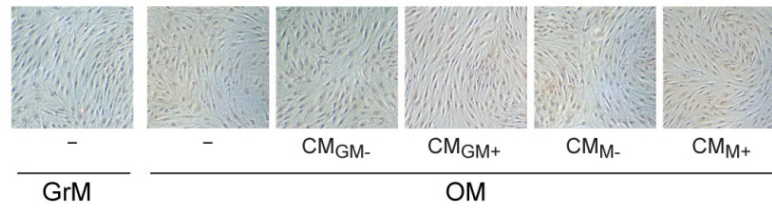

**Figure S2.** Alizarin Red S staining in MSC treated with CM from  $M\Phi_{GM}$  and  $M\Phi_M$  activated ( $CM_{GM+}$  and  $CM_{M+}$ , respectively) or not ( $CM_{GM-}$  and  $CM_{M-}$ , respectively) with LPS and further incubated in osteogenic medium (OM) for 3 or 7 days. Untreated MSC (-) were incubated in growth medium (GrM) or OM for 3 or 7 days.

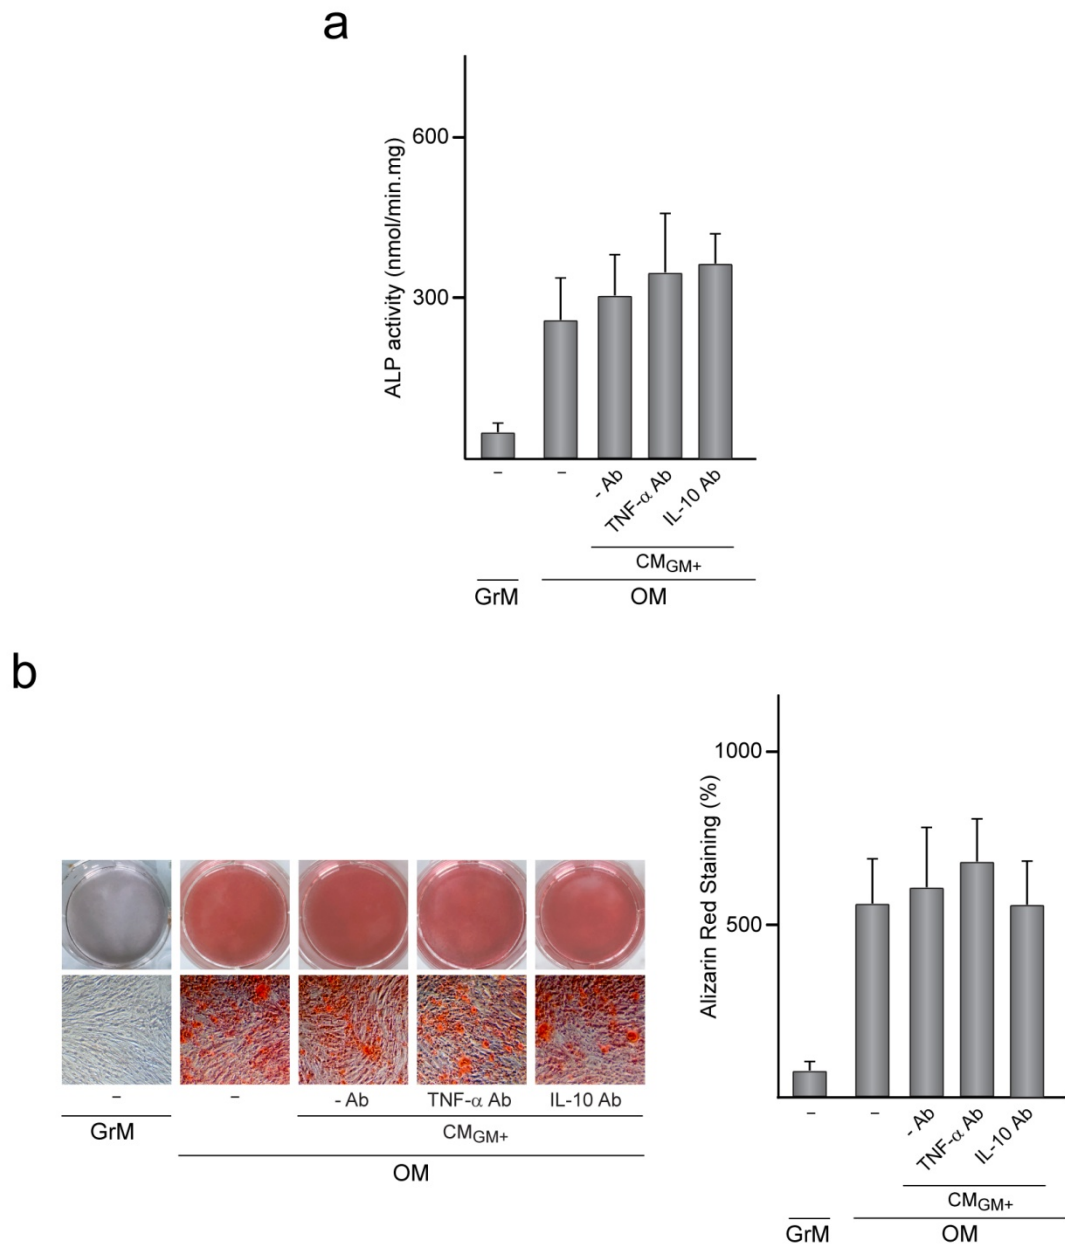

**Figure S3.** Involvement of TNF- $\alpha$  and IL-10 in the osteogenic activity of MSC treated with CM from pro-inflammatory macrophages. MSC were treated or not (-) for 48 h with CM<sub>GM+</sub> that had been incubated or not (-Ab) with TNF- $\alpha$  or IL-10 neutralizing antibody (Ab). ALP activity (a) and alizarin Red S staining and quantification (b) in MSC treated or not with CM<sub>GM+</sub> and further incubated in OM for 14 (a) or 21 (b) days. Data in b are relative to those measured in untreated MSC incubated in growth medium (GrM), which were given an arbitrary value of 100.
